# Supplementary material
Source: Research Square preprint supplement (doi:10.21203/rs.3.rs-9310646/v1)
Supplement: Supplementary file 1 [file a5685af8700b534769df6141.docx]

### Supplemental material

***Supplemental Table 1:***

|  | **Group** | | **Time** | | **Group*Time** | |  | **Post hoc** | |
| --- | --- | --- | --- | --- | --- | --- | --- | --- | --- |
|  | **p** | **ղ2p** | **p** | **ղ2p** | **p** | **ղ2p** |  | **p** | **rB** |
| **MAS Wrist Flexors** | 0.07 | 0.08 | **0.004** | **0.18** | **0.01** | **0.15** | V1 (INT vs SHAM)  V3 (INT vs SHAM)  INT (V1 vs V3)  SHAM (V1 vs V3) | 0.48  **0.03**  0.91  0.07 | 0.12  **0.38**  0.16  0.88 |
| **MAS Elbow Flexors** | 0.49 | 0.01 | 0.10 | 0.06 | 0.72 | 0.001 |  |  |  |
| **MASUL** | 0.45 | 0.01 | 0.19 | 0.04 | 0.09 | 0.07 |  |  |  |
| **FMA-UE** | 0.11 | 0.06 | **0.001** | **0.57** | **0.046** | **0.10** | V1 (INT vs SHAM)  V3 (INT vs SHAM)  INT (V1 vs V3)  SHAM (V1 vs V3) | 0.40  0.17  **0.02**  0.09 | 0.15  0.25  **0.95**  0.92 |
| **Mmax** | 0.42 | 0.02 | **0.01** | **0.20** | 0.58 | 0.01 |  |  |  |
| **Hmax** | 0.30 | 0.04 | **0.007** | **0.26** | 0.40 | 0.03 |  |  |  |
| **Hmax/Mmax** | 0.49 | 0.02 | 0.32 | 0.04 | 0.92 | 0.001 |  |  |  |

***Supplemental Table 1:*** *Statistical results for all parameters evaluated at V1 (baseline, before the start of the protocol) and V3 (after the 6-week LMV protocol). Analyses were conducted using a two-factor repeated-measures Aligned Rank Transform ANOVA (ART ANOVA) with the factors Group (INT and SHAM) and Time (V1 and V3). Partial eta-squared (ղ2p) effect sizes were interpreted as small (0.01-0.06), medium (0.06-0.14) and large (≥ 0.14). Post hoc comparisons were performed using the ARTool package, with rank biserial correlation (rB) reported as effect size, interpreted as follows: small (0.1–0.3), medium (0.3–0.5), and large (≥ 0.5). Statistical significance was set at p ≤ 0.05.*

***Supplemental Table 2:***

| **SHOULDER** | **Flexors** | | **Extensors** | | **Abductors** | | **Adductors** | | **Internal Rot** | | **External Rot** | |
| --- | --- | --- | --- | --- | --- | --- | --- | --- | --- | --- | --- | --- |
| **V1** | **V3** | **V1** | **V3** | **V1** | **V3** | **V1** | **V3** | **V1** | **V3** | **V1** | **V3** |
| **SHAM** | **0.0**  **[0.0-0.0]** | **0.0**  **[0.0-0.0]** | **0.0**  **[0.0-0.0]** | **0.0**  **[0.0-0.0]** | **0.0**  **[0.0-0.0]** | **0.0**  **[0.0-0.0]** | **0.0**  **[0.0-0.0]** | **0.0**  **[0.0-0.0]** | **0.0**  **[0.0-0.0]** | **0.0**  **[0.0-0.0]** | **0.0**  **[0.0-0.0]** | **0.0**  **[0.0-0.0]** |
| **INT** | **0.0**  **[0.0-0.0]** | **0.0**  **[0.0-0.0]** | **0.0**  **[0.0-0.0]** | **0.0**  **[0.0-0.0]** | **0.0**  **[0.0-0.0]** | **0.0**  **[0.0-0.0]** | **0.0**  **[0.0-0.0]** | **0.0**  **[0.0-0.0]** | **0.0**  **[0.0-0.0]** | **0.0**  **[0.0-0.0]** | **0.0**  **[0.0-0.0]** | **0.0**  **[0.0-0.0]** |
| **ALL** | **0.0**  **[0.0-0.0]** | **0.0**  **[0.0-0.0]** | **0.0**  **[0.0-0.0]** | **0.0**  **[0.0-0.0]** | **0.0**  **[0.0-0.0]** | **0.0**  **[0.0-0.0]** | **0.0**  **[0.0-0.0]** | **0.0**  **[0.0-0.0]** | **0.0**  **[0.0-0.0]** | **0.0**  **[0.0-0.0]** | **0.0**  **[0.0-0.0]** | **0.0**  **[0.0-0.0]** |
|  |  |  |  |  |  |  |  |  |  |  |  |  |
| **ELBOW** | **Flexors** | | **Extensors** | | **Pronators** | | **Supinators** | |  |  |  |  |
| **V1** | **V3** | **V1** | **V3** | **V1** | **V3** | **V1** | **V3** |  |  |  |  |
| **SHAM** | **1.0**  **[0.0-1.0]** | **1.0**  **[0.0-1.5]** | **0.0**  **[0.0-1.0]** | **0.0**  **[0.0-1.0]** | **0.0**  **[0.0-1.0]** | **1.5**  **[0.0-1.5]** | **0.0**  **[0.0-0.0]** | **0.0**  **[0.0-0.0]** |  |  |  |  |
| **INT** | **1.0**  **[0.0-1.0]** | **1.0 [0.0-1.0]** | **0.0**  **[0.0-1.0]** | **0.0**  **[0.0-0.0]** | **0.0**  **[0.0-1.5]** | **0.0**  **[0.0-1.0]** | **0.0**  **[0.0-0.0]** | **0.0**  **[0.0-0.0]** |  |  |  |  |
| **ALL** | **1.0**  **[0.0-1.0]** | **1.0**  **[0.0-1.5]** | **0.0**  **[0.0-1.0]** | **0.0**  **[0.0-1.0]** | **0.0**  **[0.0-1.5]** | **1.0**  **[0.0-1.5]** | **0.0**  **[0.0-0.0]** | **0.0**  **[0.0-0.0]** |  |  |  |  |
|  |  |  |  |  |  |  |  |  |  |  |  |  |
| **WRIST** | **Flexors** | | **Extensors** | |  |  |  |  |  |  |  |  |
| **V1** | **V3** | **V1** | **V3** |  |  |  |  |  |  |  |  |
| **SHAM** | **1.0 [0.0-1.0]** | **1.5 [1.0-1.5]** | **0.0**  **[0.0-0.0]** | **0.0**  **[0.0-0.0]** |  |  |  |  |  |  |  |  |
| **INT** | **1.0 [0.0-1.0]** | **1.0 [0.0-1.0]** | **0.0**  **[0.0-0.0]** | **0.0**  **[0.0-0.0]** |  |  |  |  |  |  |  |  |
| **ALL** | **1.0 [0.0-1.0]** | **1.0 [0.0-1.5]** | **0.0**  **[0.0-0.0]** | **0.0**  **[0.0-0.0]** |  |  |  |  |  |  |  |  |
|  |  |  |  |  |  |  |  |  |  |  |  |  |
| **FINGERS** | **Flexors** | | **Extensors** | | **Abductors** | | **Adductors** | |  |  |  |  |
| **V1** | **V3** | **V1** | **V3** | **V1** | **V3** | **V1** | **V3** |  |  |  |  |
| **SHAM** | **0.0**  **[0.0-0.0]** | **0.0**  **[0.0-1.0]** | **0.0**  **[0.0-0.0]** | **0.0**  **[0.0-0.0]** | **0.0**  **[0.0-0.0]** | **0.0**  **[0.0-0.0]** | **0.0**  **[0.0-0.0]** | **0.0**  **[0.0-0.0]** |  |  |  |  |
| **INT** | **0.0**  **[0.0-0.0]** | **0.0**  **[0.0-0.0]** | **0.0**  **[0.0-0.0]** | **0.0**  **[0.0-0.0]** | **0.0**  **[0.0-0.0]** | **0.0**  **[0.0-0.0]** | **0.0**  **[0.0-0.0]** | **0.0**  **[0.0-0.0]** |  |  |  |  |
| **ALL** | **0.0**  **[0.0-0.0]** | **0.0**  **[0.0-0.0]** | **0.0**  **[0.0-0.0]** | **0.0**  **[0.0-0.0]** | **0.0**  **[0.0-0.0]** | **0.0**  **[0.0-0.0]** | **0.0**  **[0.0-0.0]** | **0.0**  **[0.0-0.0]** |  |  |  |  |
|  |  |  |  |  |  |  |  |  |  |  |  |  |
| **THUMB** | **Opponens** | | **Extensors** | | **Flexors** | | **Adductors** | |  | |  |  |
| **V1** | **V3** | **V1** | **V3** | **V1** | **V3** | **V1** | **V3** |  |  |  |  |
| **SHAM** | **0.0**  **[0.0-0.0]** | **0.0**  **[0.0-0.0]** | **0.0**  **[0.0-0.0]** | **0.0**  **[0.0-0.0]** | **0.0**  **[0.0-0.0]** | **0.0**  **[0.0-0.0]** | **0.0**  **[0.0-0.0]** | **0.0**  **[0.0-0.0]** |  |  |  |  |
| **INT** | **0.0**  **[0.0-0.0]** | **0.0**  **[0.0-0.0]** | **0.0**  **[0.0-0.0]** | **0.0**  **[0.0-0.0]** | **0.0**  **[0.0-0.0]** | **0.0**  **[0.0-0.0]** | **0.0**  **[0.0-0.0]** | **0.0**  **[0.0-0.0]** |  |  |  |  |
| **ALL** | **0.0**  **[0.0-0.0]** | **0.0**  **[0.0-0.0]** | **0.0**  **[0.0-0.0]** | **0.0**  **[0.0-0.0]** | **0.0**  **[0.0-0.0]** | **0.0**  **[0.0-0.0]** | **0.0**  **[0.0-0.0]** | **0.0**  **[0.0-0.0]** |  |  |  |  |

***Supplemental Table 2.*** *MAS scores (median [Q1–Q3]) for each tested muscle (20 muscle groups) at both visits (V1 and V3). Colors indicate changes between visits: green = decrease visible only in the quartiles; black = no change; orange = increase visible only in the quartiles; red = increase visible in the median.*

*We can observe that changes toward an increase occur exclusively in the SHAM group, whereas changes toward a reduction occur only in the INT group; and most modifications appear at the elbow and wrist, which are the two joints receiving LMV.*

***Supplemental Figure 1:***


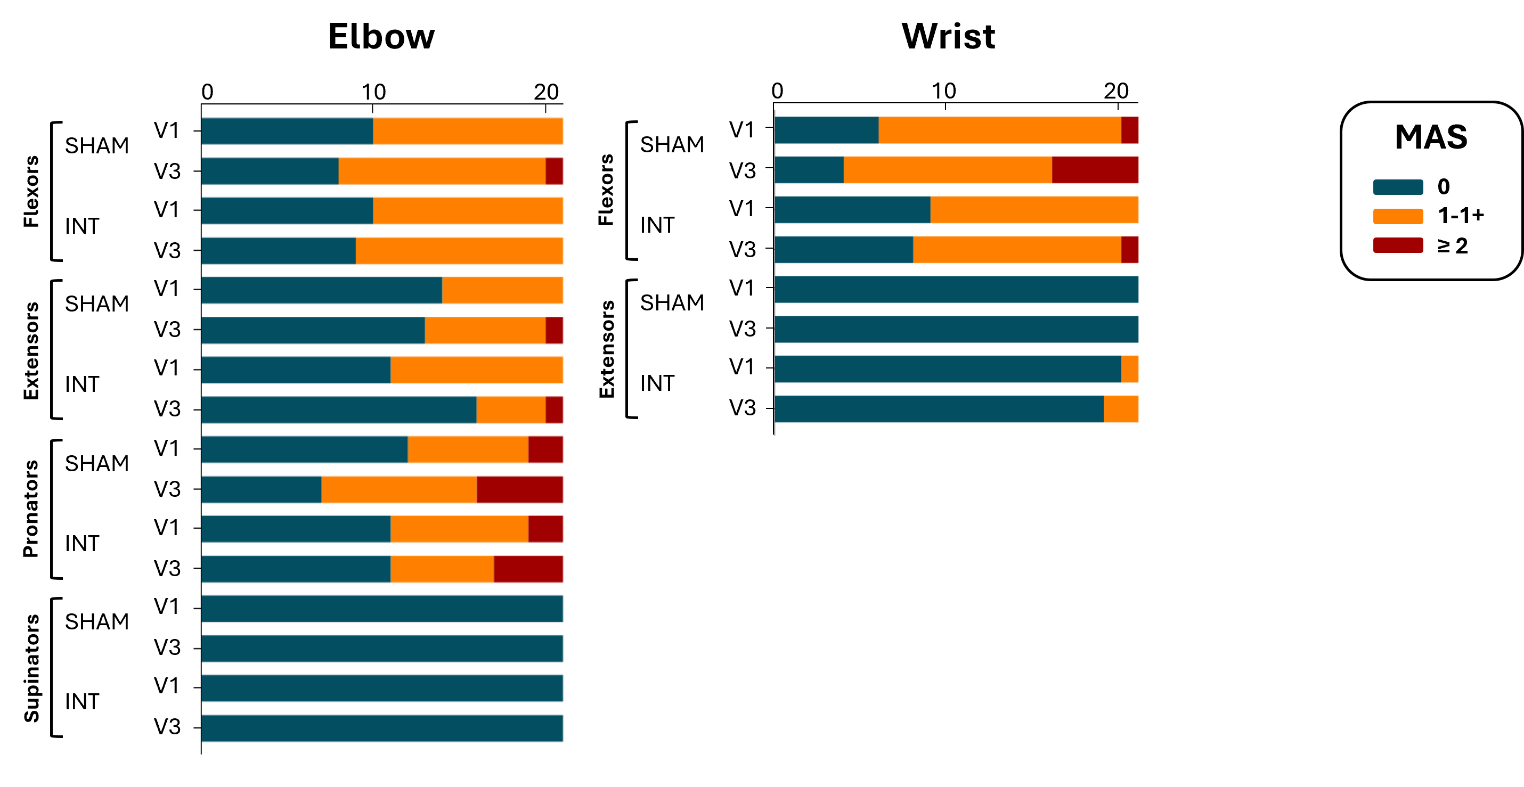


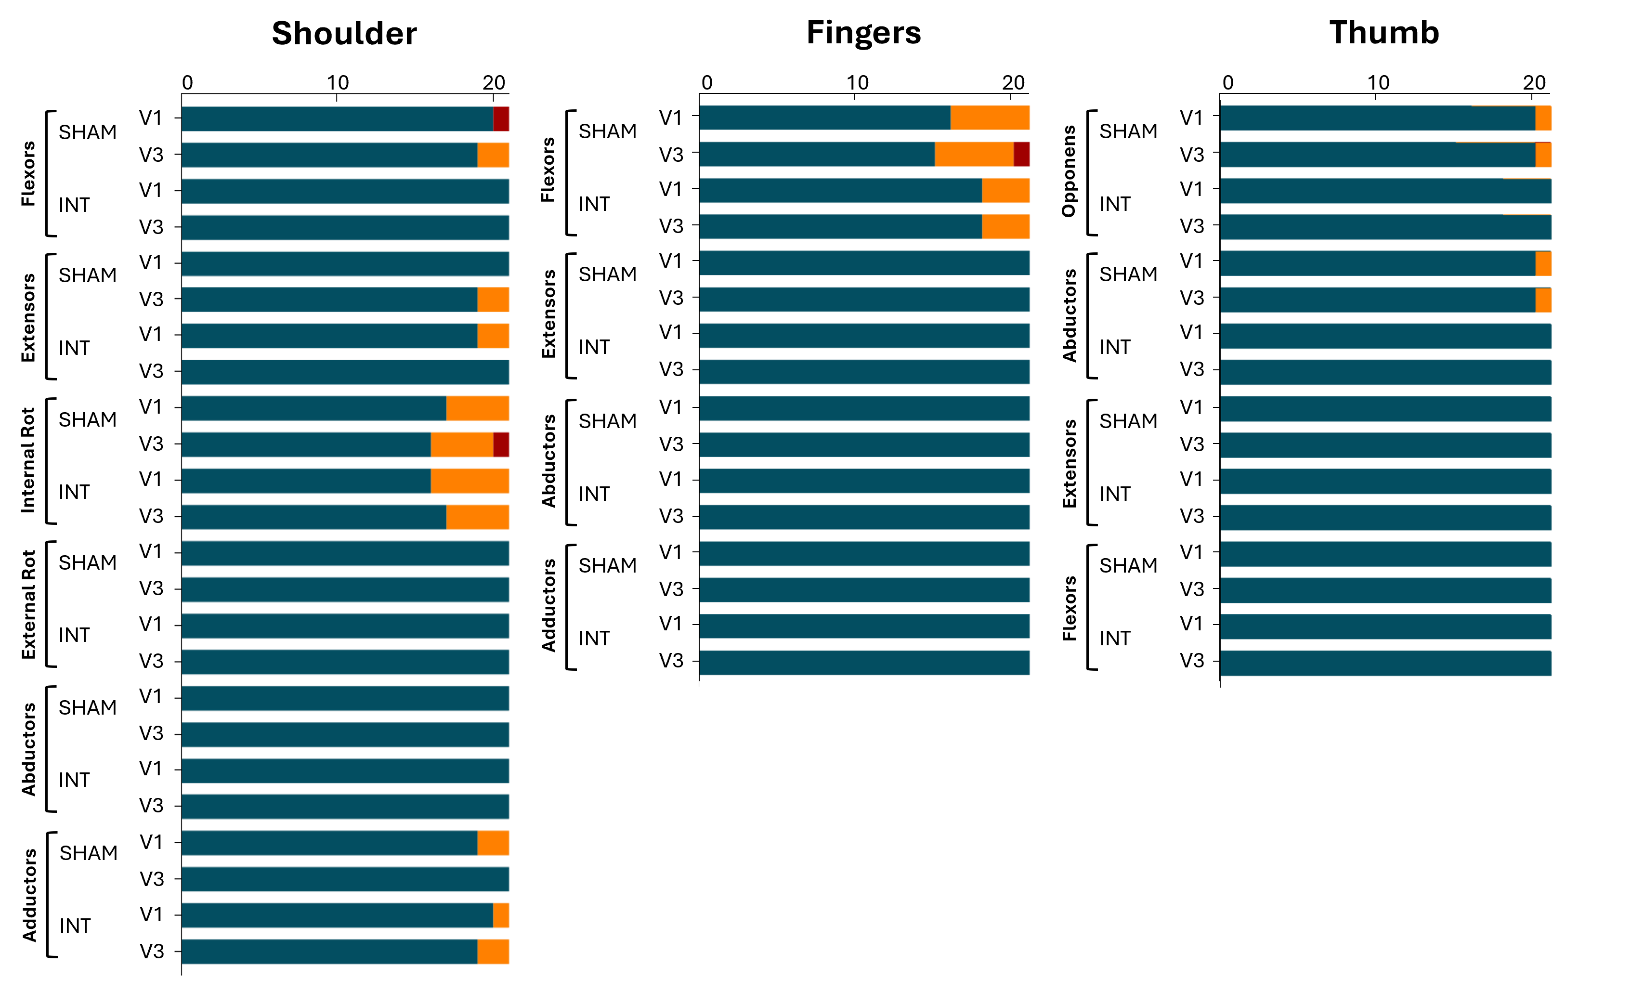


***Supplemental Figure 1:*** *Distribution of patients according to MAS score categories (0, 1 - 1+, ≥ 2) for each evaluated muscle group, at baseline (V1) and post-intervention (V3), in the INT group, and the SHAM group. Values of the x-axis represent number of patients.*

***Supplemental Table 3:***

|  | **SHAM** | | **INT** | | **ALL** | |
| --- | --- | --- | --- | --- | --- | --- |
|  | **V1** | **V3** | **V1** | **V3** | **V1** | **V3** |
| **0-22**  *No capacities* | 19 | 14 | 16 | 11 | 35 *(83%)* | 25 *(60%)* |
| **23-31**  *Poor capacities* | 1 | 2 | 3 | 1 | 4 *(10%)* | 3 *(7%)* |
| **32-47**  *Limited capacities* | 1 | 3 | 2 | 6 | 3 *(7%)* | 9 *(21%)* |
| **48-52**  *Notable capacities* | 0 | 1 | 0 | 2 | 0 *(0%)* | 3 *(7%)* |
| **53-66**  *Full capacities* | 0 | 1 | 0 | 1 | 0 *(0%)* | 2 *(5%)* |

***Supplemental Table 3:*** *Distribution of patients across FMA-UE categories according to Hoonhorst et al., 2015, at baseline (V1) and post-intervention (V3), for the INT group, SHAM group, and the entire cohort (ALL).*
